# Supplementary material for: Systemic Inflammation Characterizes Lack of Metabolic Health in Nonobese HIV-Infected Men
Source: Hindawi journal article supplement (doi:10.1155/2018/5327361), 2018-09-25
Supplement: f1 [file 5327361.f1.pdf]

Supplementary Table 1. Biomarkers concentrations by Antiretroviral Regimen

| Biomarkers                                     | PI(n) | PI*              | NNRTI(n) | NNRTI*          | INSTI(n) | INSTI*           |
|------------------------------------------------|-------|------------------|----------|-----------------|----------|------------------|
| Age (years)                                    | 227   | 53(48-59)        | 245      | 53(49-59)       | 87       | 55(50-59)        |
| IL-6 (pg/ml)                                   | 221   | 1.5(1.1-2.4)     | 238      | 1.4(0.9-2.2)    | 82       | 1.8(1.1-2.9)     |
| CRP (ug/ml)                                    | 222   | 1.1(0.7-2.5)     | 238      | 1.3(0.7-2.7)    | 82       | 1.3(0.7-2.8)     |
| sTNFRI (pg/ml)                                 | 223   | 1162(976-1499)   | 236      | 1222(982-1519)  | 85       | 1208(1022-1516)  |
| sTNFRII (pg/ml)                                | 223   | 6588(5425-8131)  | 236      | 6220(5283-7578) | 85       | 7079(5802-8717)  |
| sCD 163 (ng/ml)                                | 217   | 693(535-855)     | 226      | 623(476-796)    | 79       | 734(533-978)     |
| sCD 14 (ng/ml)                                 | 214   | 1587(1360-1859)  | 225      | 1707(1502-1993) | 77       | 1583(1375-1925)  |
| Adiponectin (ng/ml)                            | 223   | 5755(3553-9220)  | 237      | 6391(4082-9949) | 82       | 5845(3369-9913)  |
| Leptin (pg/ml)                                 | 223   | 6118(2980-11660) | 237      | 4847(2260-9173) | 82       | 6034(2554-14818) |
| Abdominal VAT area (cm <sup>2</sup> )          | 226   | 159(99-218)      | 245      | 160(103-220)    | 87       | 178(104-228)     |
| Thigh subcutaneous fat area (cm <sup>2</sup> ) | 226   | 24(10-46)        | 245      | 23(10-38)       | 87       | 20(8-51)         |
| HOMA-IR (mmol/L x uU/ml)                       | 196   | 4(2-6)           | 210      | 3(2-4)          | 72       | 3(2-5)           |

\*Median (interquartile range) or percent; HOMA-IR: homeostatic model assessment of insulin resistance; hs-CRP: high-sensitivity C-reactive protein; IL-6: Interleukin-6; INSTI=integrase strand transfer inhibitors IQR: interquartile range; sCD163: soluble CD163; sCD14: soluble CD14; NNRTI=Non-Nucleoside Reverse Transcriptase Inhibitor; PI=Protease inhibitor; sTNFRI-II: Soluble tumor necrosis factor receptor I-II; VAT: Visceral adipose tissue

**Supplementary Table 2. Biomarkers concentrations by Most Common Antiretroviral Drugs**

| <i>CVD2 markers</i>                            | <i>Lopinavir(n)</i> | <i>Lopinavir*</i> | <i>Atazanavir(n)</i> | <i>Atazanavir*</i> | <i>Darunavir(n)</i> | <i>Darunavir*</i> | <i>Efavirenz(n)</i> | <i>Efavirenz*</i> |
|------------------------------------------------|---------------------|-------------------|----------------------|--------------------|---------------------|-------------------|---------------------|-------------------|
| Age at CVD2 CT-scan(years)                     | 38                  | 53(48-57)         | 93                   | 52(47-58)          | 67                  | 55(48-59)         | 164                 | 52(48-58)         |
| IL-6 (pg/ml)                                   | 38                  | 1.5(1-2)          | 89                   | 1.4(1-2.4)         | 65                  | 1.6(1.1-2.6)      | 160                 | 1.3(0.9-2.2)      |
| CRP (ug/ml)                                    | 38                  | 1.1(0.8-2.2)      | 90                   | 1.1(0.6-2.5)       | 65                  | 1.4(0.7-2.6)      | 160                 | 1.4(0.7-2.9)      |
| sTNFRI (pg/ml)                                 | 38                  | 1116(888-1411)    | 90                   | 1122(946-1486)     | 66                  | 1244(1023-1522)   | 158                 | 1197(973-1462)    |
| sTNFRII (pg/ml)                                | 38                  | 6222(4892-7443)   | 90                   | 6330(5461-7873)    | 66                  | 6884(5775-8717)   | 158                 | 6093(5262-7429)   |
| sCD 163 (ng/ml)                                | 38                  | 643(533-835)      | 89                   | 661(520-798)       | 62                  | 745(616-970)      | 152                 | 574(444-745)      |
| sCD 14 (ng/ml)                                 | 38                  | 1774(1493-2015)   | 90                   | 1568(1326-1819)    | 59                  | 1582(1353-1952)   | 152                 | 1723(1518-1982)   |
| Adiponectin (ng/ml)                            | 38                  | 6287(4493-9156)   | 90                   | 5291(3548-9110)    | 66                  | 5949(3455-9646)   | 160                 | 6469(4245-10144)  |
| Leptin (pg/ml)                                 | 38                  | 6354(3136-11448)  | 90                   | 6717(3523-12883)   | 66                  | 6804(3052-11953)  | 160                 | 4853(2107-8705)   |
| Abdominal VAT area (cm <sup>2</sup> )          | 38                  | 143(88-235)       | 93                   | 154(106-226)       | 67                  | 178(134-217)      | 164                 | 150(90-204)       |
| Thigh subcutaneous fat area (mm <sup>2</sup> ) | 38                  | 31(6-46)          | 93                   | 26(13-49)          | 67                  | 21(9-45)          | 164                 | 25(13-40)         |
| HOMA-IR (mmol/L x uU/ml)                       | 35                  | 3(3-5)            | 81                   | 4(3-6)             | 55                  | 3(2-5)            | 140                 | 3(2-4)            |

\*Median (interquartile range) or percent; HOMA-IR: homeostatic model assessment of insulin resistance; hs-CRP: high-sensitivity C-reactive protein; IL-6: Interleukin-6; sCD163: soluble CD163; sCD14: soluble CD14; sTNFRI-II: Soluble tumor necrosis factor receptor I-II; VAT: Visceral adipose tissue
